# Supplementary material for: South African consumers’ perceptions of front-of-package warning labels on unhealthy foods and drinks
Source: PLOS journal article supplement (doi:10.1371/journal.pone.0257626), 2021-09-27
Supplement: S1 (10.1371/journal.pone.0257626.s001) [file journal.pone.0257626.s001]

# Saturated fats icons (Yoghurt)

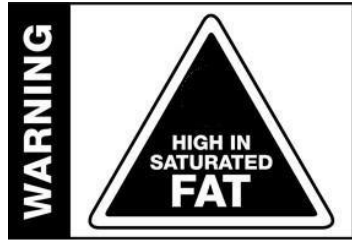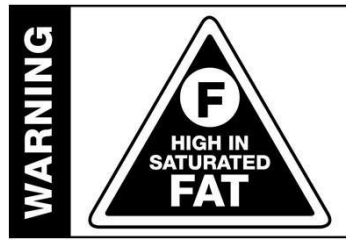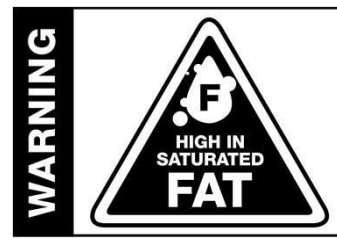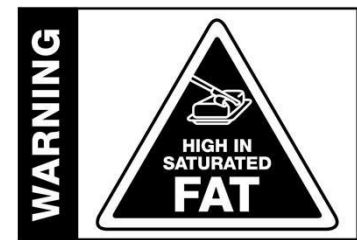

# Sugar icons (100% juice)

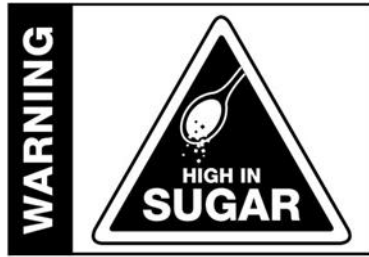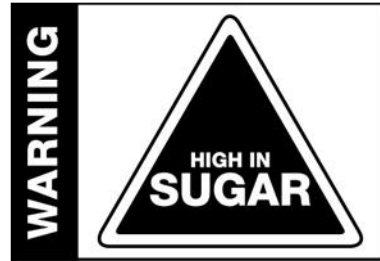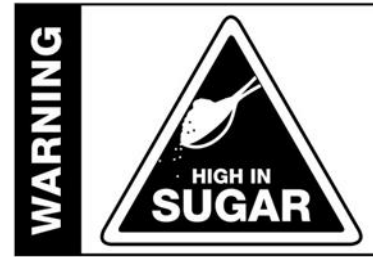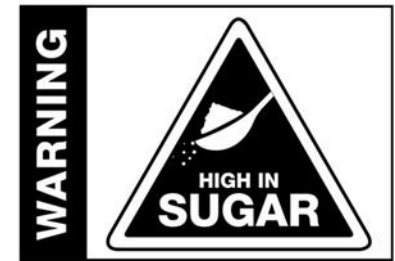

# Salt icons (Crisps)

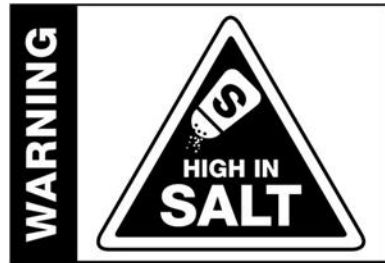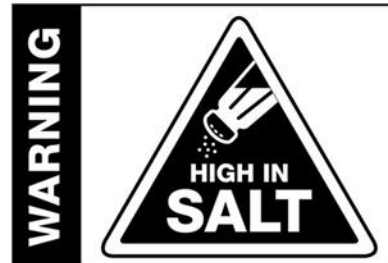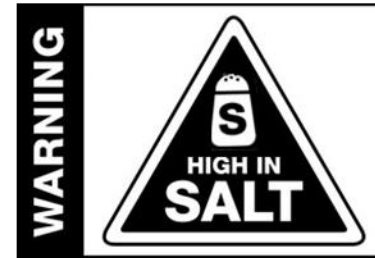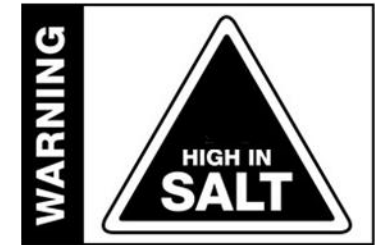

# Upper vs Sentence case

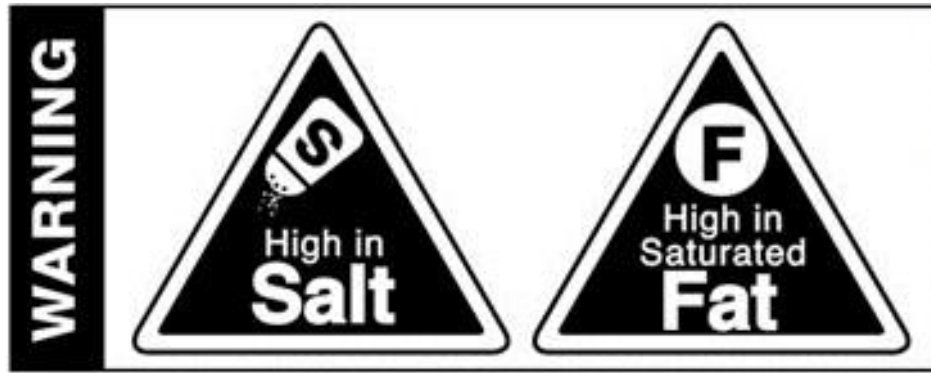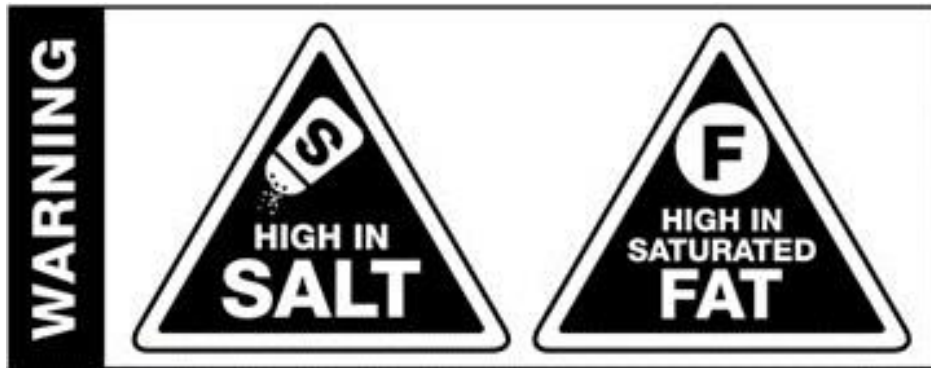

# Colour and symbol shapes

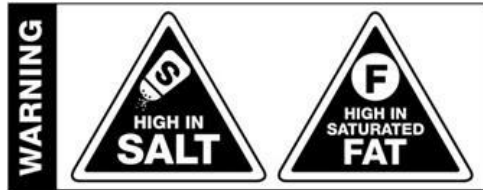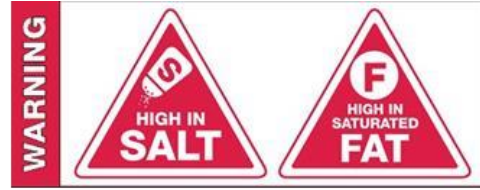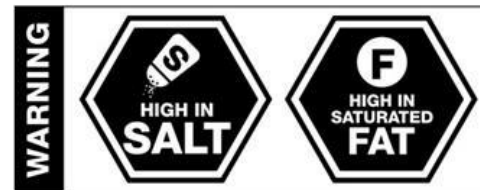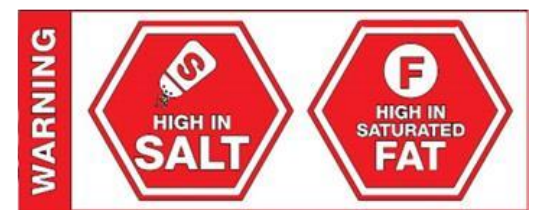

# Warning Devices

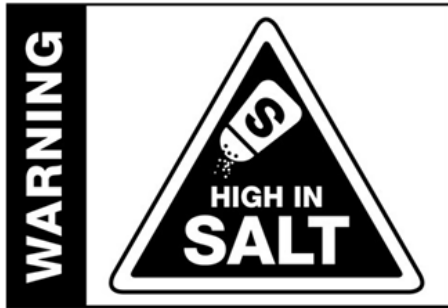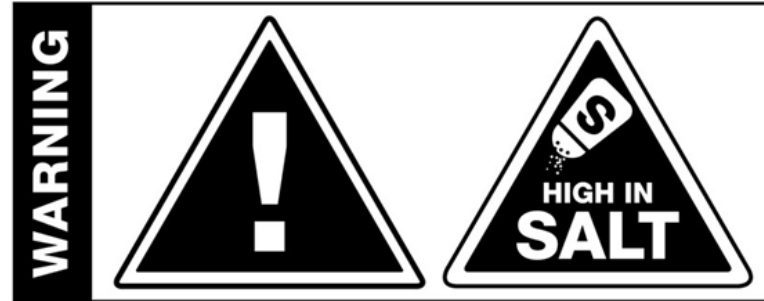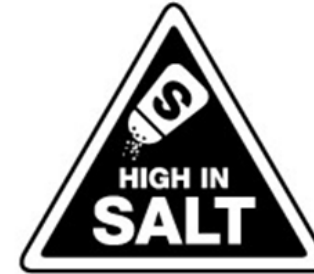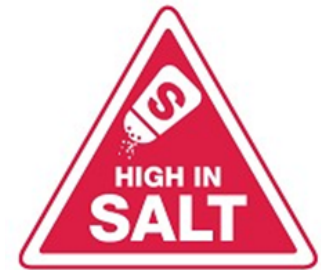

# Holding Straps

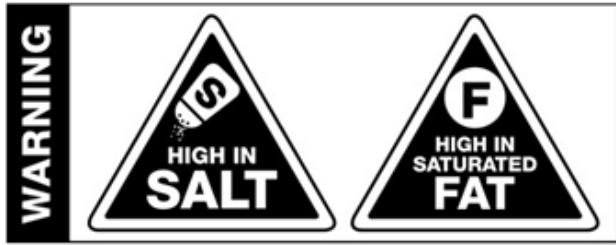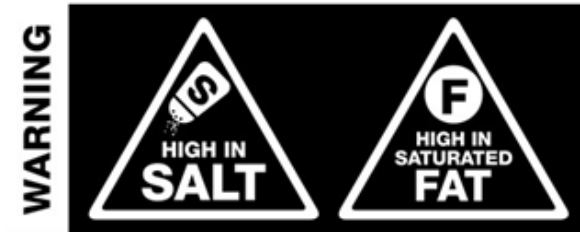

# Label Size

BREAKFAST

CEREAL

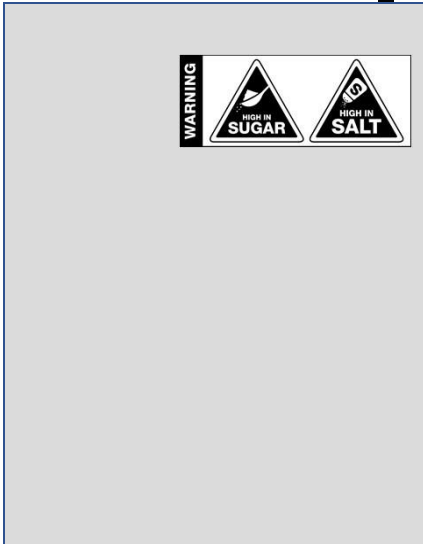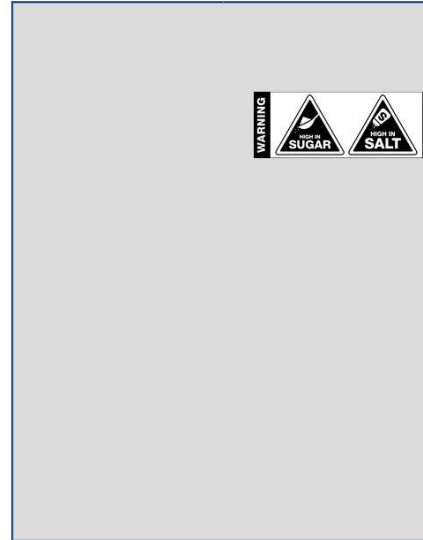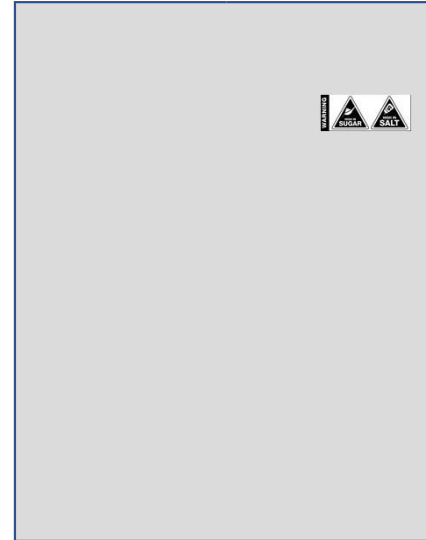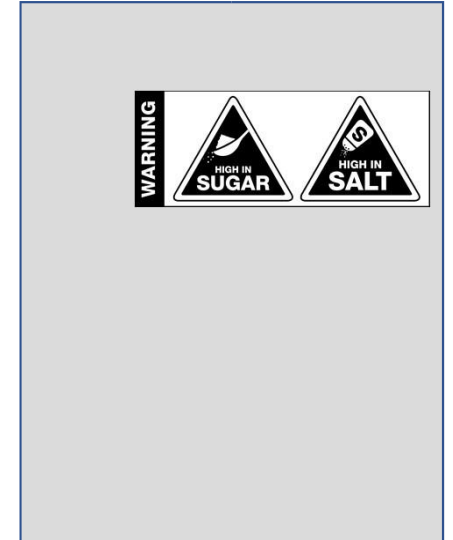



# Placement

Top of pack vs

Bottom of pack
