# Supplementary material for: South African consumers’ perceptions of front-of-package warning labels on unhealthy foods and drinks
Source: PLOS journal article supplement (doi:10.1371/journal.pone.0257626), 2021-09-27
Supplement: S2 (10.1371/journal.pone.0257626.s002) [file journal.pone.0257626.s002]

# Recruitment Questionnaire

## Recruitment Questionnaire

Date: Day \_\_\_\_\_ Month \_\_\_\_\_ Year: 2019  
 Time: Hour \_\_\_\_\_ Minute \_\_\_\_\_ AM/PM (please circle)

|   |                                                                                                                                 |                                                                                                                                                                                                                                                                                                                                                                                                                                                                                 |
|---|---------------------------------------------------------------------------------------------------------------------------------|---------------------------------------------------------------------------------------------------------------------------------------------------------------------------------------------------------------------------------------------------------------------------------------------------------------------------------------------------------------------------------------------------------------------------------------------------------------------------------|
| 1 | <b>Location of residence</b>                                                                                                    | <input type="checkbox"/> Soweto<br><input type="checkbox"/> Diepsloot<br><input type="checkbox"/> Cosmo city<br><input type="checkbox"/> Zanspruit<br><input type="checkbox"/> Adams mission<br><input type="checkbox"/> Umbumbulu<br><input type="checkbox"/> Ndwedwe<br><input type="checkbox"/> Durban central<br><input type="checkbox"/> Khayelitsha<br><input type="checkbox"/> Khayamandi<br><input type="checkbox"/> Fisantekraal<br><input type="checkbox"/> Gugulethu |
| 2 | Do you work in any of the following industries?                                                                                 | <input type="checkbox"/> Health promotion (thank and terminate)<br><input type="checkbox"/> Market Research (thank and terminate)<br><input type="checkbox"/> Advertising (thank and terminate)<br><input type="checkbox"/> Tobacco industry (thank and terminate)<br><input type="checkbox"/> Food and Beverage industry (e.g., supermarkets, restaurants, retail companies) (thank and terminate)<br><input type="checkbox"/> None of the above (continue)                    |
| 3 | How often do you purchase branded packaged foods and drinks?<br><i>(ensure a mix of participants)</i>                           | <input type="checkbox"/> Never (thank and terminate)<br><input type="checkbox"/> Rarely<br><input type="checkbox"/> A few times a week<br><input type="checkbox"/> About once a day<br><input type="checkbox"/> Multiple times a day                                                                                                                                                                                                                                            |
| 4 | Are you...                                                                                                                      | <input type="checkbox"/> Male<br><input type="checkbox"/> Female                                                                                                                                                                                                                                                                                                                                                                                                                |
| 5 | Are you...                                                                                                                      | <input type="checkbox"/> 18 - 35 yrs old<br><input type="checkbox"/> 36 - 50 yrs old                                                                                                                                                                                                                                                                                                                                                                                            |
| 6 | Please indicate your highest level of education attained:                                                                       | <input type="checkbox"/> No Schooling (Not literate )<br><input type="checkbox"/> Grade 1 – up to Grade 7 (Low literacy)<br><input type="checkbox"/> Passed Grade 7 & above (Literate)                                                                                                                                                                                                                                                                                          |
| 7 | Please indicate your household income category<br><i>(check quota and ensure a mix of participants)</i>                         | <input type="checkbox"/> No income: R0<br><input type="checkbox"/> Low income: R1–R1600<br><input type="checkbox"/> Middle income: R1601-R25 600<br><input type="checkbox"/> Upper income: R25 601 and above                                                                                                                                                                                                                                                                    |
| 8 | Are you the parent or caregiver for children aged 16 years and below?<br><i>(check quotas and ensure a mix of participants)</i> | <input type="checkbox"/> Yes<br><input type="checkbox"/> No                                                                                                                                                                                                                                                                                                                                                                                                                     |

|    |                                                                                                                                                                                                                       |                                                                                                                                                                                                                                                      |
|----|-----------------------------------------------------------------------------------------------------------------------------------------------------------------------------------------------------------------------|------------------------------------------------------------------------------------------------------------------------------------------------------------------------------------------------------------------------------------------------------|
| 9  | <p>Are you the main decision-maker for food purchases in your home</p> <p><i>(check quotas and ensure a mix of participants)</i></p>                                                                                  | <input type="checkbox"/> Yes<br><input type="checkbox"/> No                                                                                                                                                                                          |
| 10 | <p>Are you the main buyer of food and groceries in your home?</p> <p><i>(check quotas and ensure a mix of participants)</i></p>                                                                                       | <input type="checkbox"/> Yes, I am the main buyer<br><input type="checkbox"/> No, but I do share the responsibility<br><input type="checkbox"/> No, I am not the main buyer                                                                          |
| 11 | <p>From where do you buy food and groceries most of the time</p>                                                                                                                                                      | <input type="checkbox"/> Loyalty clubs<br><input type="checkbox"/> Stokvel clubs<br><input type="checkbox"/> Retailers (supermarkets)<br><input type="checkbox"/> Retailers (spaza shops, vendors)<br><input type="checkbox"/> Other (specify) _____ |
| 12 | <p>In a typical week, how often do you consume packaged branded foods, such as breakfast cereal, crisps, sweetened beverages, sweets, biscuits, etc</p> <p><i>(check quotas and ensure a mix of participants)</i></p> | <input type="checkbox"/> Never<br><input type="checkbox"/> Rarely<br><input type="checkbox"/> A few times a week<br><input type="checkbox"/> About once a day<br><input type="checkbox"/> Multiple times a day                                       |
